# Supplementary material for: Ablation of Cbl-b and c-Cbl in macrophages causes severe spontaneous lung inflammation via enhancing the M-CSFR signaling pathway
Source: Research Square preprint supplement (doi:10.21203/rs.3.rs-5497778/v1), 2024-12-04
Supplement: Supplementary file 1 [file 3499cd4a887b65a3796b100b.docx]

**Supplementary information
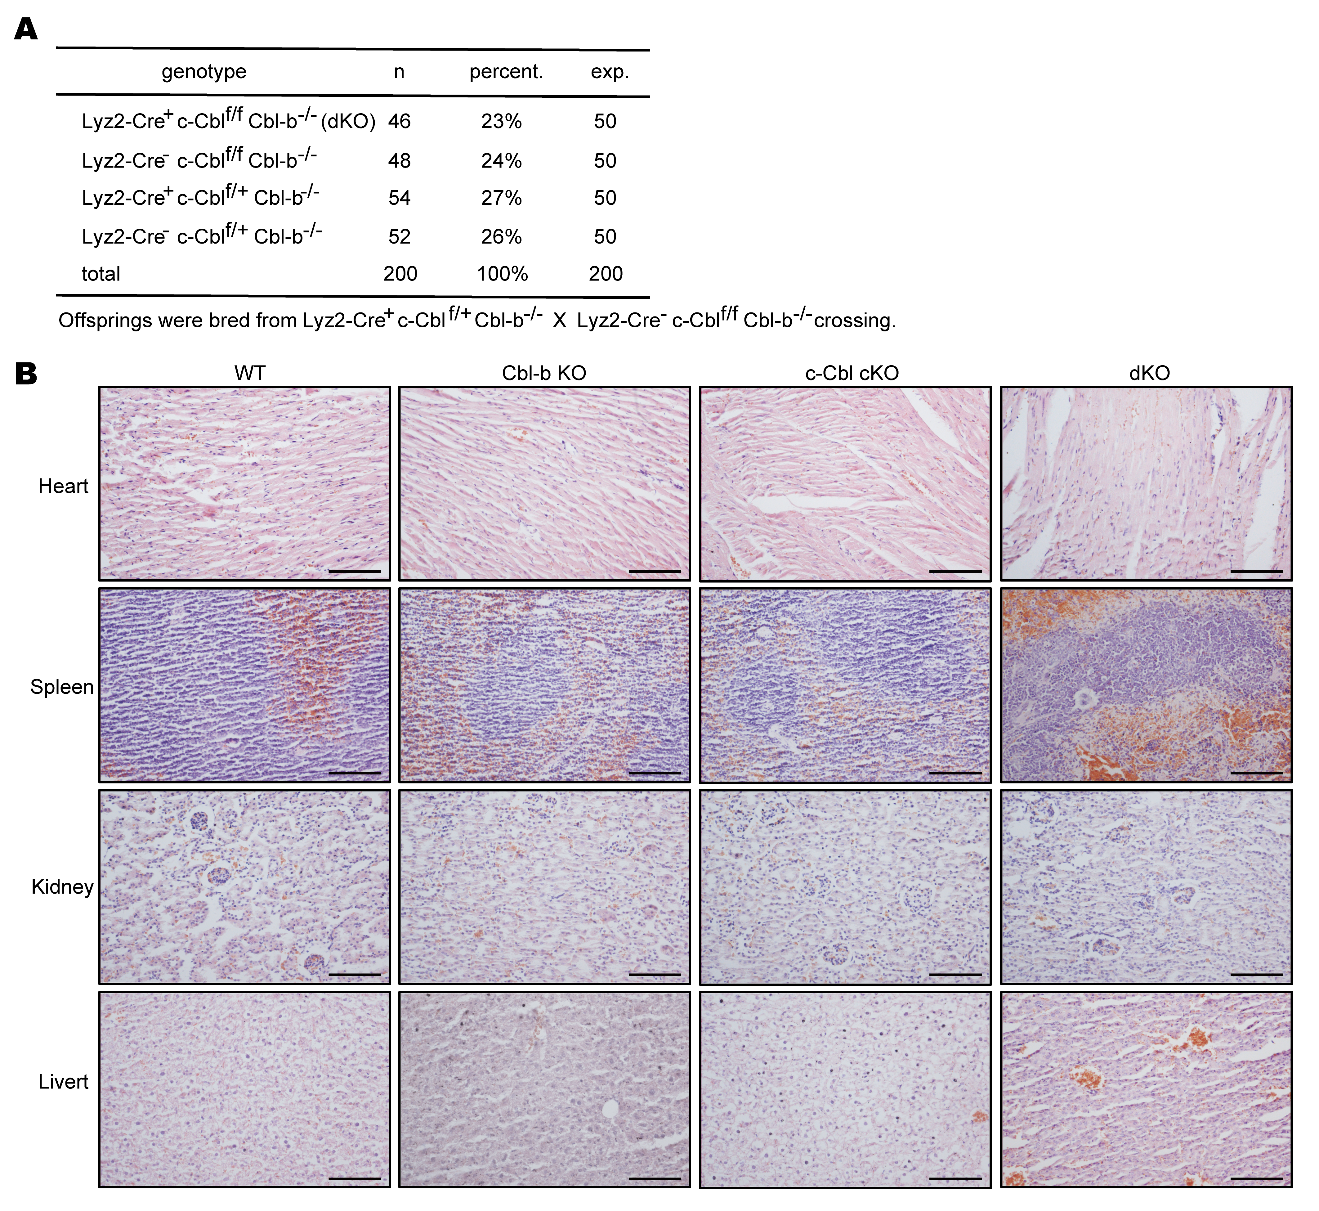
**

**Supplementary Figure. 1 Hematoxylin and eosin (H&E) stained sections of multiple organs of four groups of mice**.

(**A**) Genotypes of offspring from Lyz2-Cre+ c-Cblf/+ Cbl-b-/- X Lyz2-Cre- c-Cblf/f Cbl-b-/- crossings.

(**B**) Indicated tissues were removed and fixed with 4% fixative solution, and paraffin sections were stained with hematoxylin and eosin (n=3 per group); scale bars 100 μm. Data represent three independent experiments.


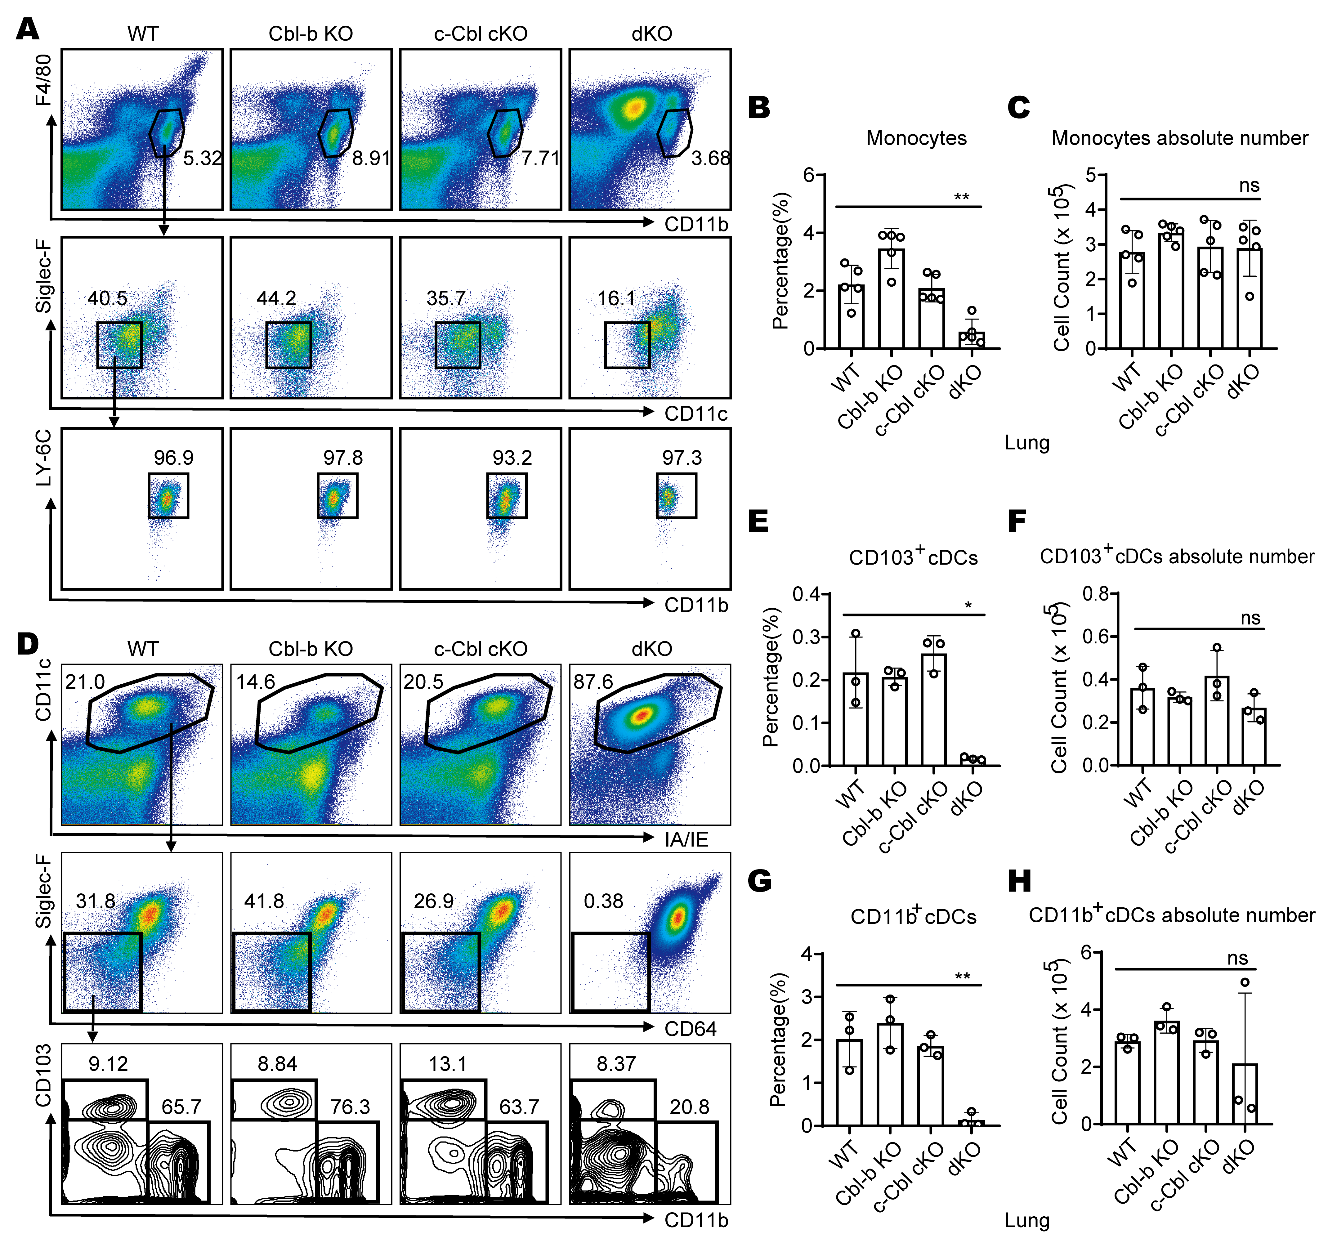


**Supplementary Figure. 2 There were no significant changes in cDCs in dKO lung.**

(**A**) Flow cytometry analysis of monocytes (F4/80int CD11bhigh Siglec-Flow CD11clow LY-6Chigh) in lungs from four groups of mice. n=5 per group.

(**B and C**) Statistics of percentage (**B**) and absolute number (**C**) of monocytes in lungs from four groups of mice, as shown in A.

(**D**) Flow cytometry analysis of CD103+ cDCs (CD11c+ IA/IE+ Siglec-F- CD64- CD103+) and CD11b+ cDCs (CD11c+ IA/IE+ Siglec-F- CD64- CD11b+) in lungs from four groups of mice. n=3 per group.

(**E and F**) Statistics of percentage (**E**) and absolute number (**F**) of CD103+ cDCs in lungs from four groups of mice, as shown in D.

(**G and H**) Statistics of percentage (**G**) and absolute number (**H**) of CD11b+ cDCs in lungs from four groups of mice, as shown in D. *ns*, no significance, **p*<0.05, ***p*<0.01, ****p*<0.001, *****p*<0.0001. *p*<0.05 was considered statistically significant.


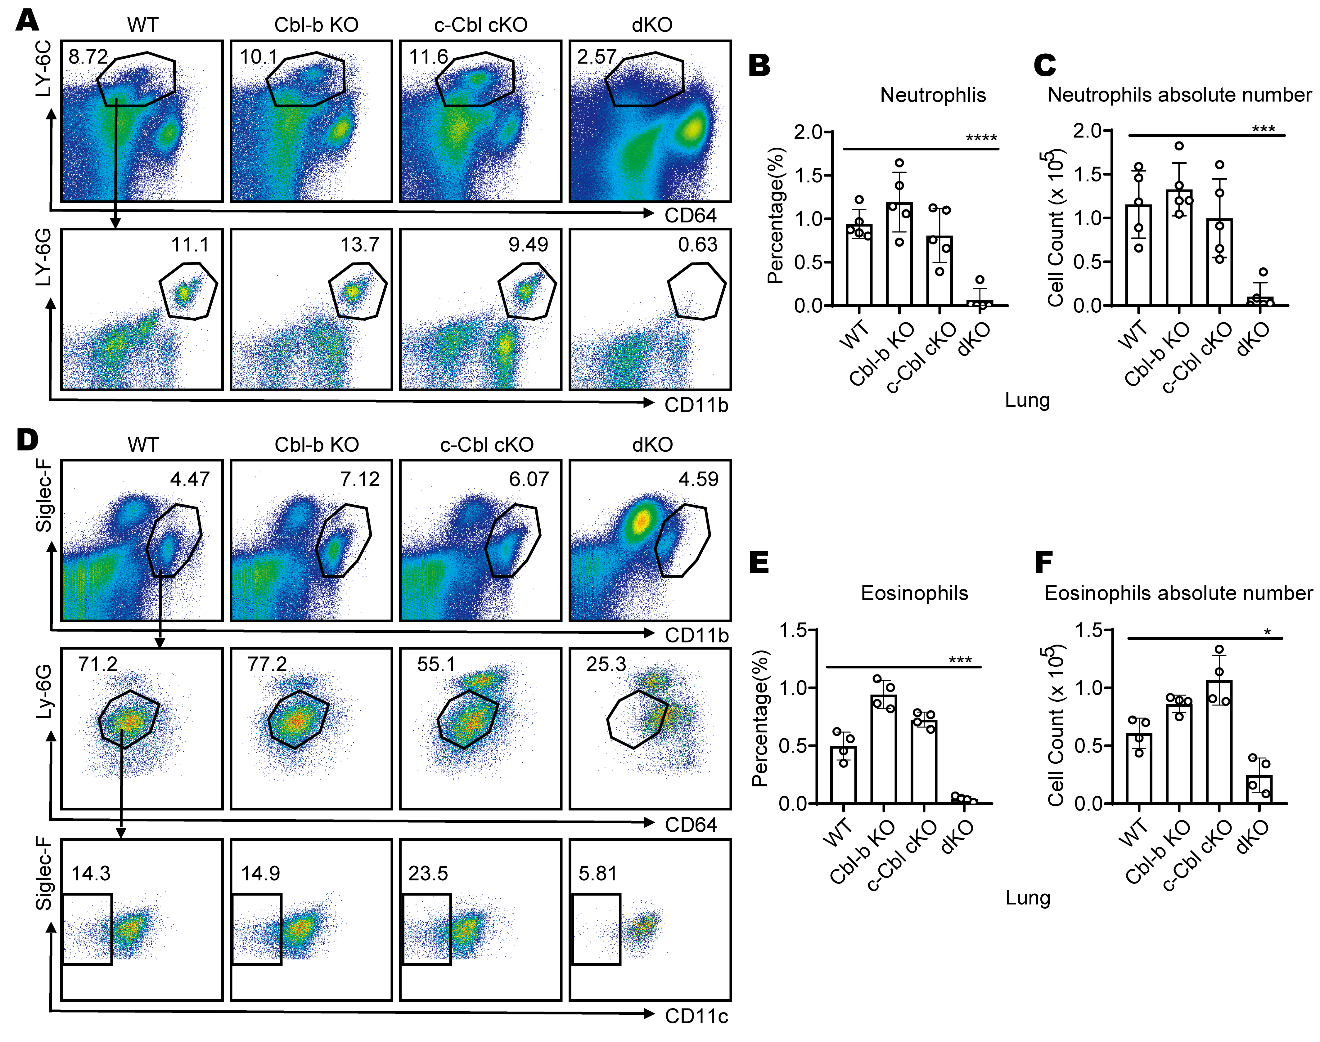


**Supplementary Figure. 3 Neutrophils and eosinophils were reduced in DKO lung.**

(**A**) Flow cytometry analysis of neutrophlis (LY-6Chigh CD64low LY-6Ghigh CD11bhigh) in lungs from four groups of mice. n=5 per group.

(**B and C**) Statistics of percentage (**B**) and absolute number (**C**) of neutrophlis in lungs from four groups of mice, as shown in A.

(**D**) Flow cytometry analysis of eosinophils (Siglec-Fhigh CD11bhigh CD64low LY-6Cint CD11c-) in lungs from four groups of mice. n=3 per group.

(**E and F**) Statistics of percentage (**E**) and absolute number (**F**) of eosinophils in lungs from four groups of mice, as shown in D. *ns*, no significance, **p*<0.05, ***p*<0.01, ****p*<0.001, *****p*<0.0001. *p*<0.05 was considered statistically significant.


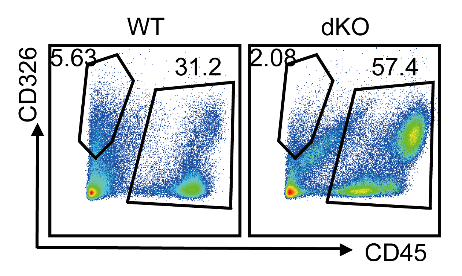


**Supplementary Figure. 4 The proportion of AT2 cells and immune cells in the lungs of WT and dKO mice.**

Flow cytometry analysis of AT2 cells (CD45- CD326+) and CD45+ Immune cells in lungs from WT and dKO mice. n=3 per group.


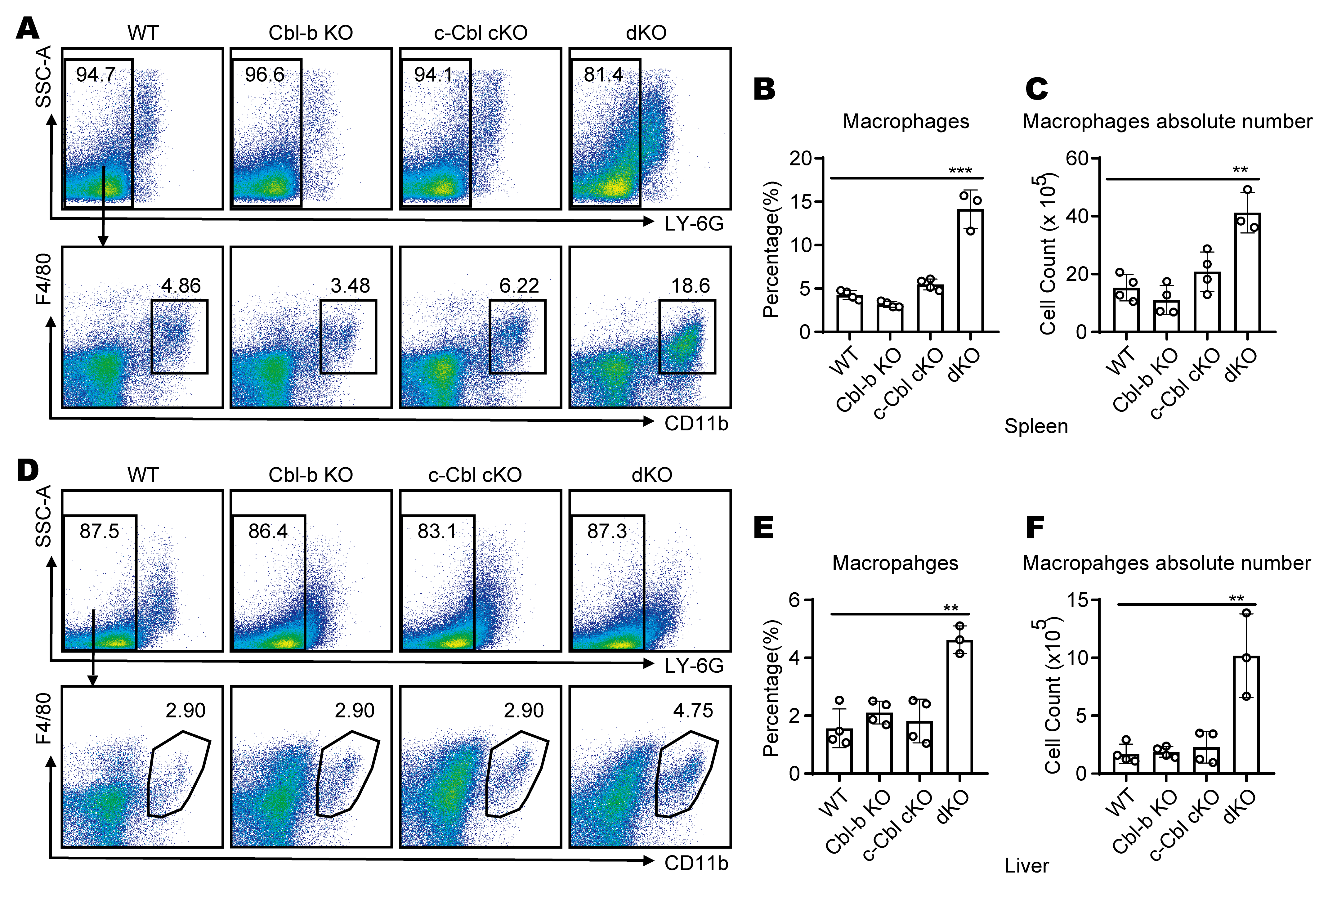


**Supplementary Figure. 5 Macrophages were accumulated in dKO spleen and liver.**

(**A**) Flow cytometry analysis of macrophages (LY-6G- F4/80+ CD11b+) in spleens from four groups of mice. n=3-4 per group.

(**B and C**) Statistics of percentage (**B**) and absolute number (**C**) of macrophages in spleens from four groups of mice, as shown in A.

(**D**) Flow cytometry analysis of macrophages (LY-6G- F4/80+ CD11b+) in leukocytes which were isolated from four groups of mice livers. n=3-4 per group.

(**E and F**) Statistics of percentage (**E**) and absolute number (**F**) of macrophages in leukocytes which were isolated from four groups of mice livers, as shown in D. *ns*, no significance, **p*<0.05, ***p*<0.01, ****p*<0.001, *****p*<0.0001. *p*<0.05 was considered statistically significant.


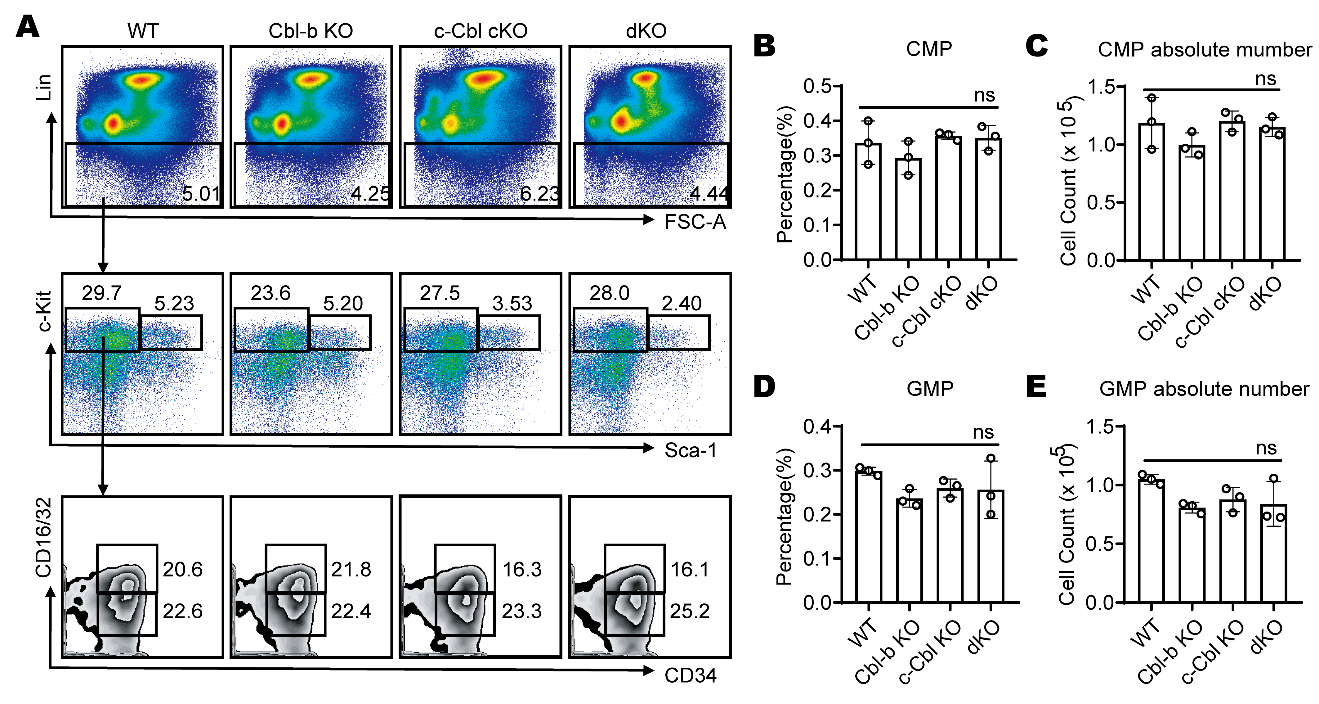


**Supplementary Figure. 6 Ablation of Cbl-b and c-Cbl in macrophages did not influence the development of macrophages.**

(**A**) Flow cytometry analysis of CMP (Lin- Sca-1- c-kit+ CD34+ CD16/32low) and GMP (Lin- Sca-1- c-kit+ CD34+ CD16/32high) in bone marrow from four groups of mice. n=3 per group.

(**B and C**) Statistics of percentage (**B**) and absolute number (**C**) of CMP in bone marrow from four groups of mice, as shown in A.

(**D and E**) Statistics of percentage (**D**) and absolute number (**E**) of GMP in bone marrow from four groups of mice, as shown in A. *ns*, no significance, **p*<0.05, ***p*<0.01, ****p*<0.001, *****p*<0.0001. *p*<0.05 was considered statistically significant.


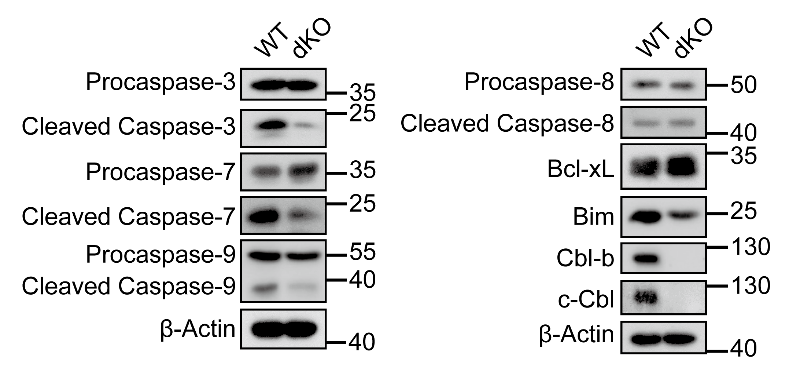


**Supplementary Figure. 7 Detection of apoptosis-related protein expression levels in WT and dKO BMDM.**

Western blot analysis of cleaved caspase-3, -7, -8, -9, Bim and Bcl-xL in WT and dKO BMDMs generated in M-CSF dependent BM cell culture.


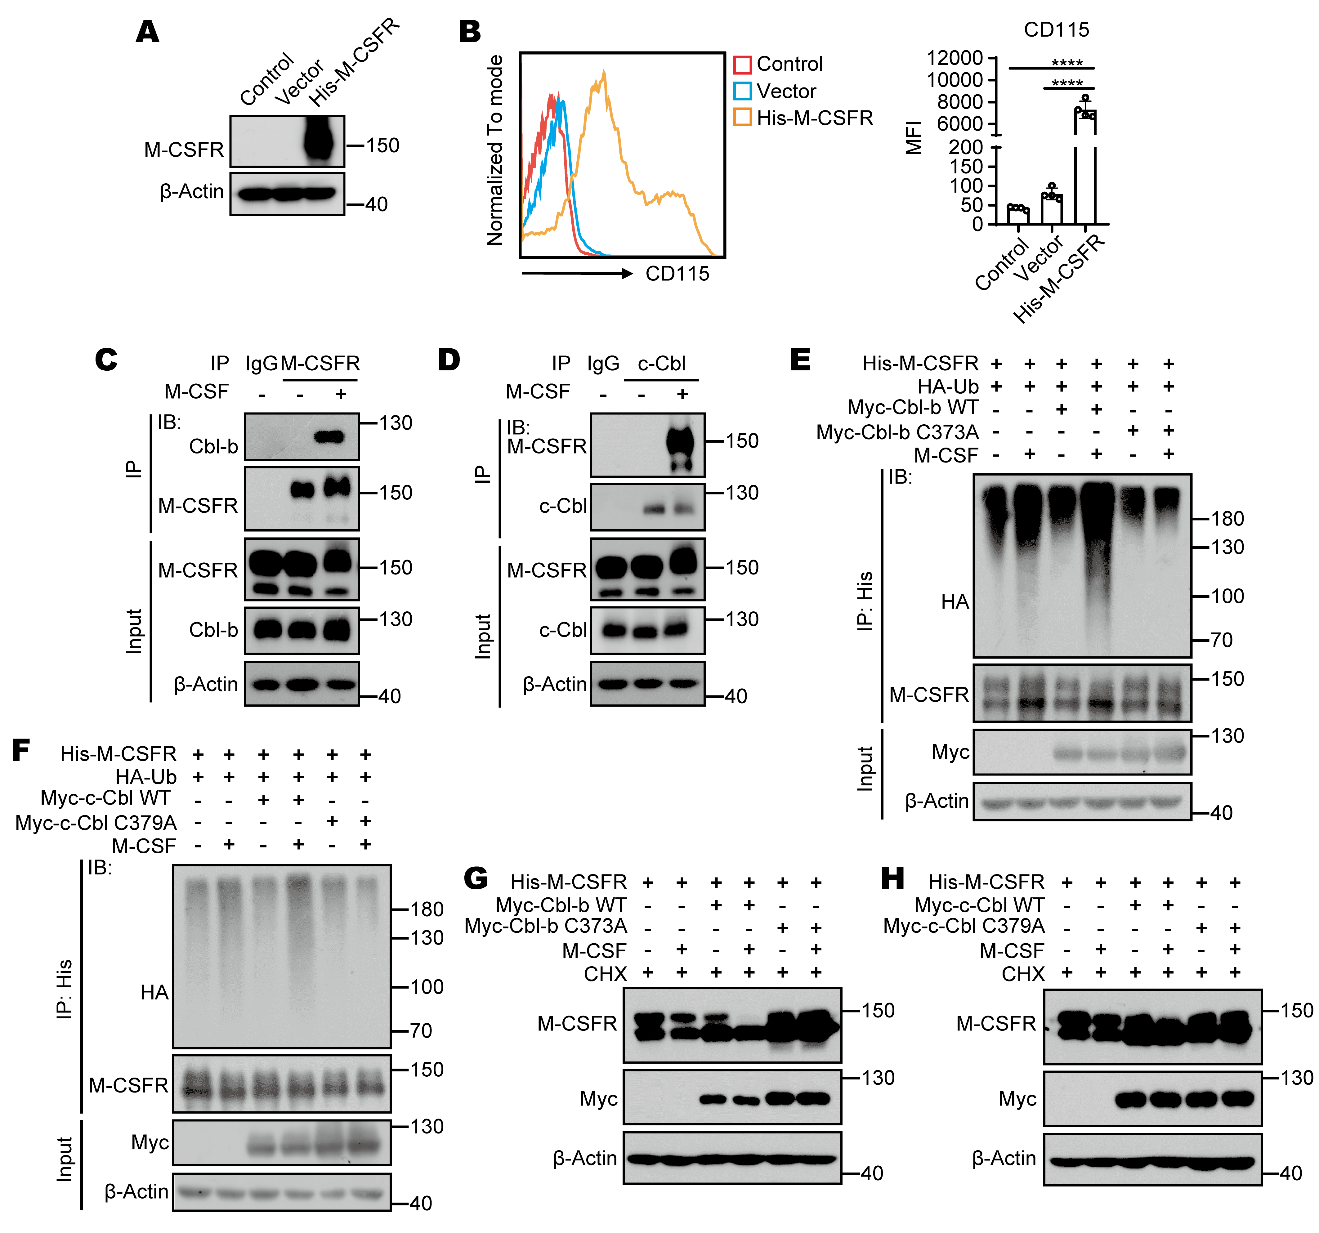


**Supplementary Figure. 8 Cbls mediate M-CSF-induced the ubiquitination and degradation of M-CSFR dependent on their ubiquitination enzyme activity.**

(**A**) Western blot analysis of M-CSFR expression in HEK293T cells transfected with His-M-CSFR.

(**B**) Flow cytometry analysis of cell surface expression of CD115 (M-CSFR) in HEK293T cells transfected with His-M-CSFR.

(**C**) Immunoprecipitation analysis of endogenous interaction M-CSFR and Cbl-b in MH-S cells treated with M-CSF (50 ng/mL).

(**D**) Immunoprecipitation analysis of endogenous interaction M-CSFR and c-Cbl in MH-S cells treated with M-CSF (50 ng/mL).

(**E**) Immunoprecipitation analysis of polyubiquitination of M-CSFR in HEK293T cells cotransfected with His-M-CSFR, HA-Ub and Myc-Cbl-b (WT or inactive C373A mutant) and then treated with M-CSF (50 ng/mL) for 2 h.

(**F**) Immunoprecipitation analysis of polyubiquitination of M-CSFR in HEK293T cells cotransfected with His-M-CSFR, HA-Ub and Myc-c-Cbl (WT or inactive C379A mutant) and then treated with M-CSF (50 ng/mL) for 2 h.

(**G**) Western blot analysis of M-CSFR in HEK293T cells cotransfected with His-M-CSFR and Myc-Cbl-b (WT or inactive C373A mutant) and then treated with M-CSF (50 ng/mL) and CHX (50 µM) for 2 h.

(**H**) Western blot analysis of M-CSFR in HEK293T cells cotransfected with His-M-CSFR and Myc-c-Cbl (WT or inactive C379A mutant) and then treated with M-CSF (50 ng/mL) and CHX (50 µM) for 2 h. *ns*, no significance, **p*<0.05, ***p*<0.01, ****p*<0.001, *****p*<0.0001. *p*<0.05 was considered statistically significant.


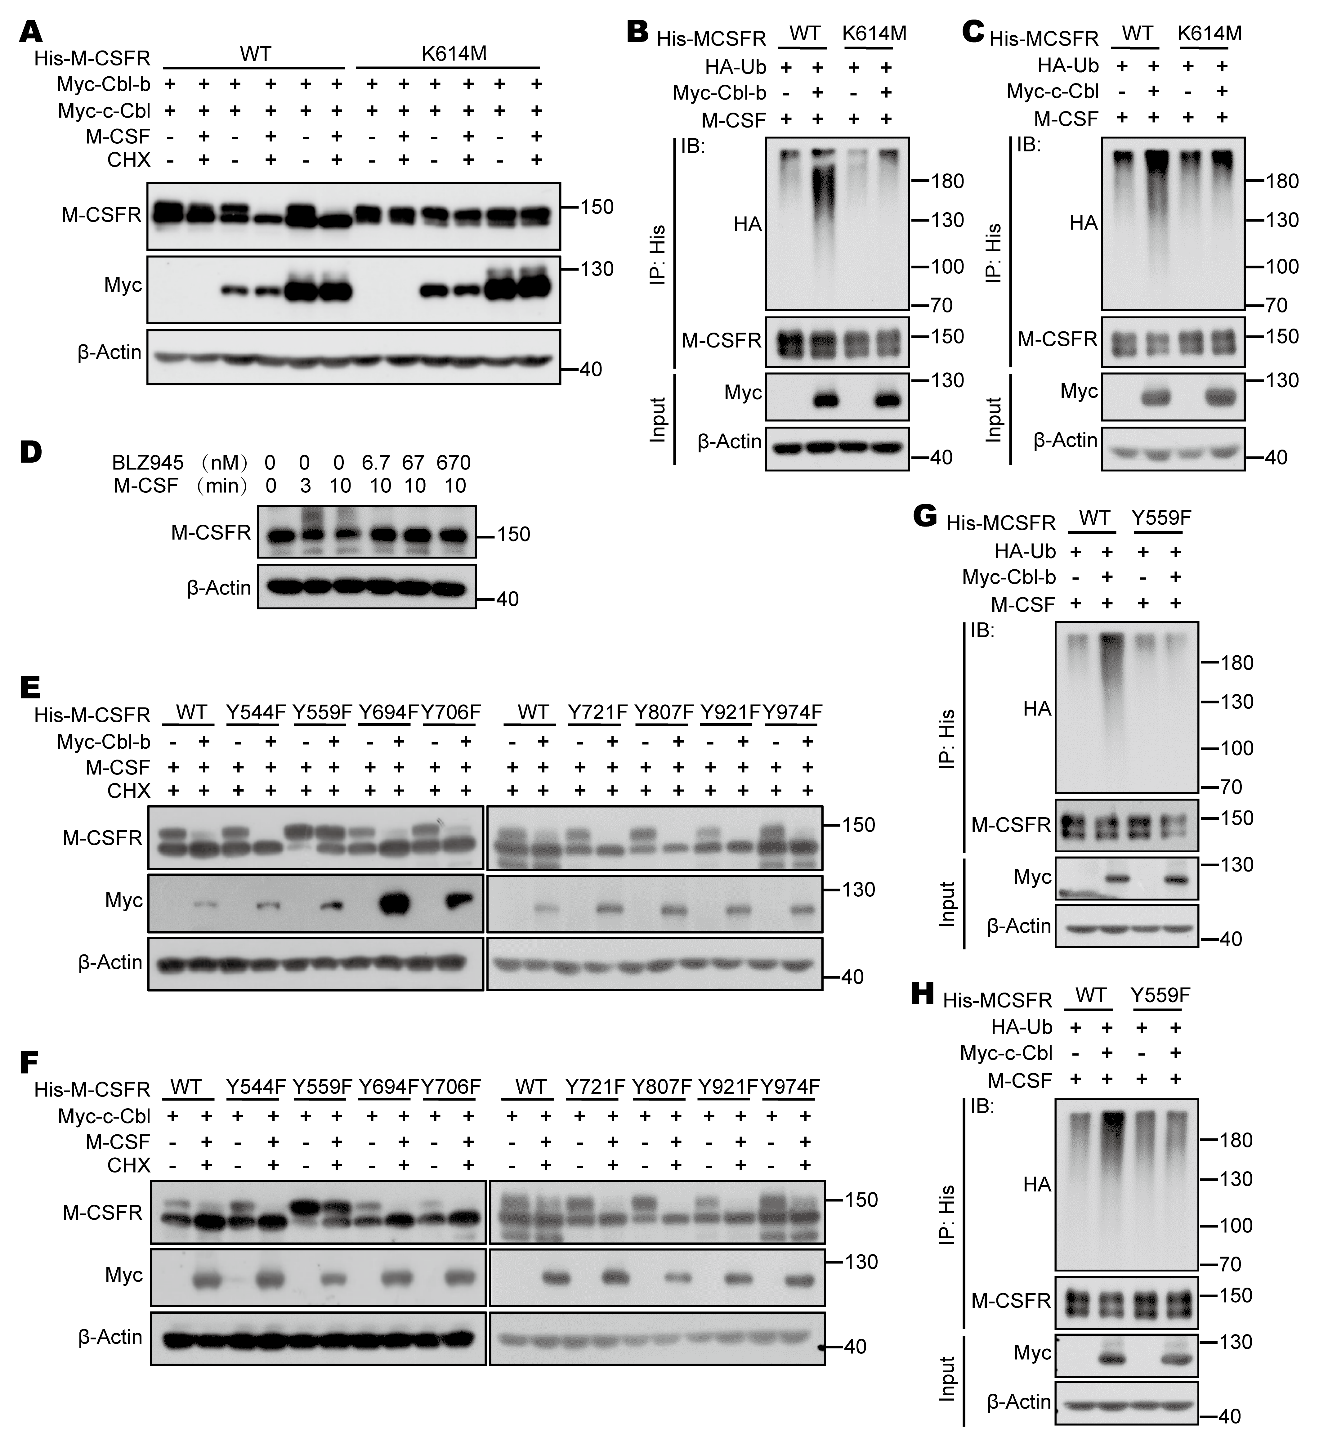


**Supplementary Figure. 9 Autophosphorylation of M-CSFR is critical for M-CSFR ubiquitination and degradation.**

(**A**) Western blot analysis of M-CSFR in HEK293T cells cotransfected with His-M-CSFR (WT or K614M) and Myc-Cbl (Cbl-b or c-Cbl) and then treated with M-CSF (50 ng/mL) and CHX (50 µM) for 2 h.

(**B**) Immunoprecipitation analysis of polyubiquitination of M-CSFR in HEK293T cells cotransfected with His-M-CSFR (WT or K614M), HA-Ub and Myc-Cbl-b and then treated with M-CSF (50 ng/mL) for 2 h.

(**C**) Immunoprecipitation analysis of polyubiquitination of M-CSFR in HEK293T cells cotransfected with His-M-CSFR (WT or K614M), HA-Ub and Myc-c-Cbl and then treated with M-CSF (50 ng/mL) for 2 h.

(**D**) WT BMDMs were starved of M-CSF for 24 h and treated with M-CSF (50 ng/mL) and different concentrations of BLZ945 for indicated times and harvested for western blot analysis of M-CSFR.

(**E**) Western blot analysis of M-CSFR in HEK293T cells cotransfected with His-M-CSFR (WT or its tyrosine mutants) and Myc-Cbl-b and then treated with M-CSF (50 ng/mL) and CHX (50 µM) for 2 h.

(**F**) Western blot analysis of M-CSFR in HEK293T cells cotransfected with His-M-CSFR (WT or its tyrosine mutants) and Myc-c-Cbl and then treated with M-CSF (50 ng/mL) and CHX (50 µM) for 2 h.

(**G**) Immunoprecipitation analysis of polyubiquitination of M-CSFR in HEK293T cells cotransfected with His-M-CSFR (WT or Y559F), HA-Ub and Myc-Cbl-b and then treated with M-CSF (50 ng/mL) for 2 h.

(**H**) Immunoprecipitation analysis of polyubiquitination of M-CSFR in HEK293T cells cotransfected with His-M-CSFR (WT or Y559F), HA-Ub and Myc-c-Cbl and then treated with M-CSF (50 ng/mL) for 2 h.


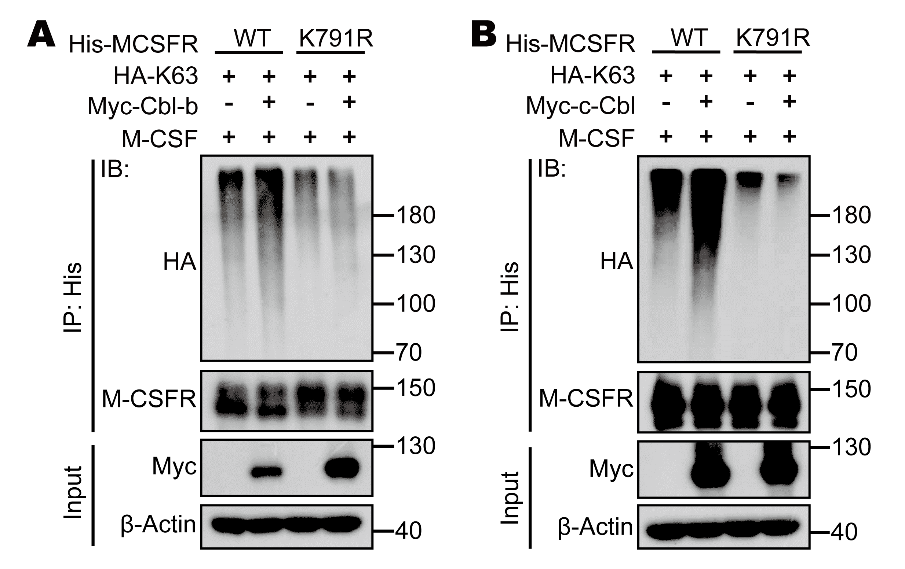


**Supplementary Figure. 10 Cbls mediate the K63-linked polyubiquitination modification at Lys791 of M-CSFR.**

(**A**) Immunoprecipitation analysis of K63-linked polyubiquitination of M-CSFR in HEK293T cells cotransfected with His-M-CSFR (WT or K791R), HA-K63 and Myc-Cbl-b and then treated with M-CSF (50 ng/mL) for 2 h.

(**B**) Immunoprecipitation analysis of K63-linked polyubiquitination of M-CSFR in HEK293T cells cotransfected with His-M-CSFR (WT or K791R), HA-K63 and Myc-c-Cbl and then treated with M-CSF (50 ng/mL) for 2 h.


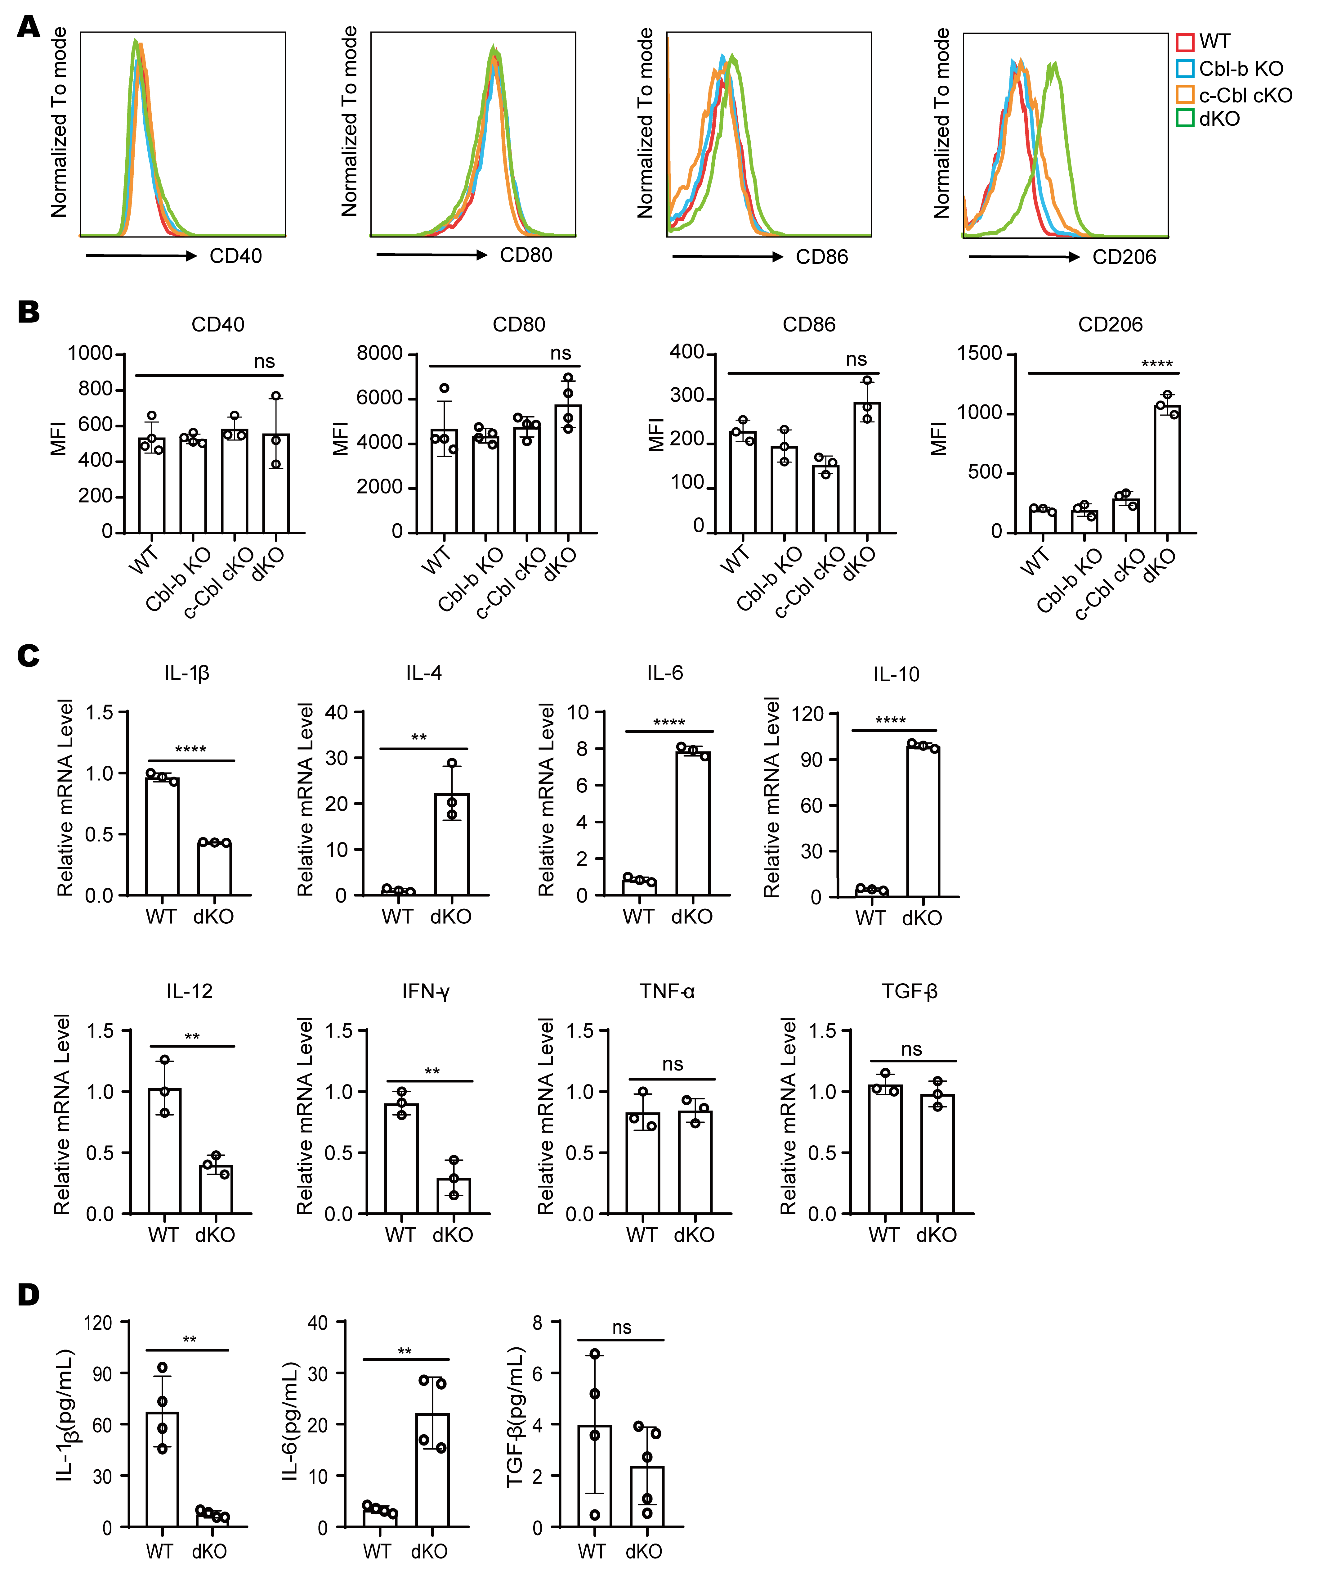


**Supplementary Figure. 11 The biased M2 type of dKO mice macrophages caused lung inflammation in the mice**

(**A, B**) The surface expression of CD40, CD80, CD86 and CD206 on AMs in BALF detected by flow cytometry. n=3-4 per group.

(**C**) QPCR analysis of cytokines including IL-1β, IL-4, IL-6, IL-10, IL-12, IFN-γ, TNF-α and TGF-βexpression in lungs of WT and dKO mice.

(**D**) Elisa analysis of cytokines including IL-1β, IL-6 and TGF-βexpression in BALF of WT and dKO mice. n=3-4 per group. *ns*, no significance, **p*<0.05, ***p*<0.01, ****p*<0.001, *****p*<0.0001. *p*<0.05 was considered statistically significant.


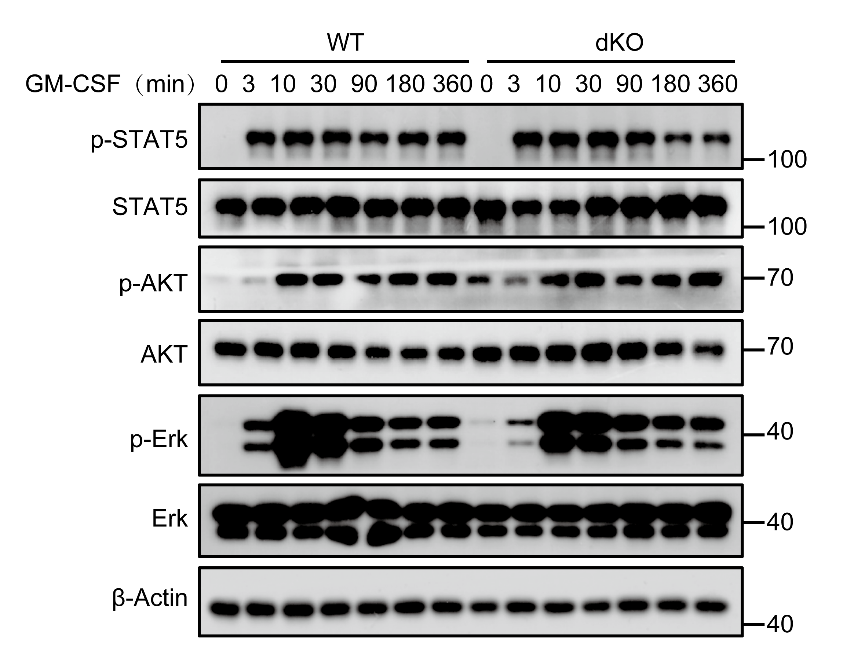


**Supplementary Figure. 12 WT and dKO BMDMs showe similar STAT5, AKT and Erk activation upon GM-CSF stimulation.**

WT and dKO BMDMs were starved of M-CSF for 24 h and restimulated with GM-CSF (50 ng/mL) for indicated times and harvested for western blot analysis of p-STAT5, p-AKT and p-Erk.

**Supplementary Table 1.** **Primers for qPCR.**

| **Gene** |  | **Direction** | **Sequence 5’- to - 3’** |
| --- | --- | --- | --- |
| IL-1β |  | Forward | GAAGAAGTGCCCATCCTCTG |
|  | Reverse | AGCTCATATGGGTCCGACAG |
| IL-4 |  | Forward | ATCATCGGCATTTTGAACGAGGTC |
|  | Reverse | ACCTTGGAAGCCCTACAGACGA |
| IL-6 |  | Forward | CCGGAGAGGAGACTTCACAG |
|  | Reverse | CAGAATTGCCATTGCACAAC |
| IL-10 |  | Forward | CAAGGCAGTGGAGCAGGTGAA |
|  | Reverse | CGGAGAGAGGTACAAACGAGGTT |
| IL-12 |  | Forward | AACCAGACCCGCCCAAGAAC |
|  | Reverse | GATCCTGAGCTTGCACGCAGA |
| TNF-α |  | Forward | CCACACCGTCAGCCGATTTG |
|  | Reverse | CACCCATTCCCTTCACAGAGC |
| TGF-β |  | Forward | GGATACCAACTATTGCTTCAGTCC |
|  | Reverse | AGGCTCCAAATATAGGGGCAGGGTC |
| IFN-γ |  | Forward | GCCACGGCACAGTCATTGAAA |
|  | Reverse | TTTCGCCTTGCTGTTGCTGA |
| c-Myc |  | Forward | AATCCTGTACCTCGTCCGAT |
|  | Reverse | TCTTCTCCACAGACACCACA |
| Cyclin D1 |  | Forward | TGCTACCGCACAACGCA |
|  | Reverse | TCAATCTGTTCCTGGCAGGC |
| Cyclin D2 |  | Forward | CGTGTGATGCCCTGACTGAG |
|  | Reverse | GACTTGGATCCGGCGTTATG |
| M-CSFR |  | Forward | GCGATGTGTGAGCAATGGCA |
|  | Reverse | CGGATAATCGAACCTCGCCA |
| 18S |  | Forward | CGGCTACCACATCCAAGGAA |
|  | Reverse | GCTGGAATTACCGCGGCT |
| β-actin |  | Forward | CATTGCTGACAGGATGCAGAAGG |
|  | Reverse | TGCTGGAAGGTGGACAGTGAGG |

**Supplementary Table 2. Primers for plasmid constructs.**

| **Gene** | **Direction** | **Sequence 5’- to - 3’** |
| --- | --- | --- |
| Cbl-b | Forward | CGGGGTACCGCCACCATGGCAAATTCTATGAATGGCA |
| Reverse | CCGCTCGAGCTACAGATCCTCTTCTGAGATGAGTTTTTGTTCTAGATTCAGACGTGGGGAGA |
| c-Cbl | Forward | CGGGGTACCGCCACCATGGCCGGCAACGTGAAGAA |
| Reverse | CCGCTCGAGCTACAGATCCTCTTCTGAGATGAGTTTTGTTCGGTGGCTACGTGAGCAGGA |
| M-CSFR | Forward | CGGAATTC GCCACC ATGGAGTTGG GGCCTCCTCT |
| Reverse | CCGCTCGAGTCAATGGTGATGGTGATGATGGCAGAACTGGTAGTTGTTAGG |

**Supplementary Table 3. Primers for mutant Cbl-b and c-Cbl constructs.**

| **Gene** | **Direction** | **Sequence 5’- to - 3’** |
| --- | --- | --- |
| Cbl-b C373A | Forward | TTCTCTGCACAGATCTTGGCGAGCTGAAAAGTGGAGCC |
| Reverse | GGCTCCACTTTTCAGCTCGCCAAGATCTGTGCAGAGAA |
| Cbl-b Y363F | Forward | TGGAGCCCATTTCACAAAACAGTTCATACTGCTCC |
| Reverse | GGAGCAGTATGAACTGTTTTGTGAAATGGGCTCCA |
| Cbl-b Y664F | Forward | GAGGAGGGACATCGAATTCTTCAGTGGCAAGGTG |
| Reverse | CACCTTGCCACTGAAGAATTCGATGTCCCTCCTC |
| Cbl-b Y708F | Forward | GATGAAGGAATCTTGAATTCATCGTCATCATCTTCTACCGTG |
| Reverse | CACGGTAGAAGATGATGACGATGAATTCAAGATTCCTTCATC |
| Cbl-b Y889F | Forward | GGAGCTGGTCAAAGTCCTGCGAGGCTCT |
| Reverse | AGAGCCTCGCAGGACTTTGACCAGCTCC |
| c-Cbl C379A | Forward | CATTCTCAGCACATATCTTAGCCAGTTGAAATGTGGAGCCCA |
| Reverse | TGGGCTCCACATTTCAACTGGCTAAGATATGTGCTGAGAATG |
| c-Cbl Y369F | Forward | GAGCCCATTTCACAGAATAATTCATATTGTTCCTGGGTTACTTT |
| Reverse | AAAGTAACCCAGGAACAATATGAATTATTCTGTGAAATGGGCTC |
| c-Cbl Y672F | Forward | CAGCCAGAGAGAAAATGGCGTTGGCAGACG |
| Reverse | CGTCTGCCAACGCCATTTTCTCTCTGGCTG |
| c-Cbl Y698F | Forward | TGTGGGAGTCATAAATTCTGTGTCCTCTTCACTTTCC |
| Reverse | GGAAAGTGAAGAGGACACAGAATTTATGACTCCCACA |
| c-Cbl Y737F | Forward | TACATCGCTTCAAAGGTACAGCTGTCGATCTGCTG |
| Reverse | CAGCAGATCGACAGCTGTACCTTTGAAGCGATGTA |
| c-Cbl Y780F | Forward | GGCTTAGGCACATCAAAGCCATCATCCTCGTTTT |
| Reverse | AAAACGAGGATGATGGCTTTGATGTGCCTAAGCC |

**Supplementary Table 4. Primers for mutant M-CSFR constructs.**

| **Gene** | **Direction** | **Sequence 5’- to - 3’** |
| --- | --- | --- |
| M-CSFR K614M | Forward | CGTGGACTTTAGCATCATCACAGCCACCTTCAG |
| Reverse | CTGAAGGTGGCTGTGATGATGCTAAAGTCCACG |
| M-CSFR Y544F | Forward | GCGCACCTGGAACTTCGGCTTCTGCTTGTA |
| Reverse | TACAAGCAGAAGCCGAAGTTCCAGGTGCGC |
| M-CSFR Y559F | Forward | GTAGGGTCAATGAAGGTGAAGCTATTGCCTTCGTATC |
| Reverse | GATACGAAGGCAATAGCTTCACCTTCATTGACCCTAC |
| M-CSFR Y697F | Forward | CAGGTGGATGTTCTTGAAGCTGGAGTCTCCCTC |
| Reverse | GAGGGAGACTCCAGCTTCAAGAACATCCACCTG |
| M-CSFR Y706F | Forward | CCCTGCGCACAAATTTCTTCTCCAGGTGGATGT |
| Reverse | ACATCCACCTGGAGAAGAAATTTGTGCGCAGGG |
| M-CSFR Y721F | Forward | GCCTCATCTCCACGAAGGTGTCTACACCCTG |
| Reverse | CAGGGTGTAGACACCTTCGTGGAGATGAGGC |
| M-CSFR Y807F | Forward | CCCTTGACAACAAAGTTGGAGTCATTCATGATGTCC |
| Reverse | GGACATCATGAATGACTCCAACTTTGTTGTCAAGGG |
| M-CSFR Y921F | Forward | GCAGGTTAGCAAAGTCCTGGTCTCTCCTCTC |
| Reverse | GAGAGGAGAGACCAGGACTTTGCTAACCTGC |
| M-CSFR Y974F | Forward | GATGGCAGAACTGGAAGTTGTTAGGCTGCAGCAG |
| Reverse | CTGCTGCAGCCTAACAACTTCCAGTTCTGCCATC |
| M-CSFR K572R | Forward | CGAGGGAACTCCCACCTCTCA TTGTAGGGCA |
| Reverse | TGCCCTACAATGAGAGGTGGG AGTTCCCTCG |
| M-CSFR K584R | Forward | CCGGCTCCTAGAGTCCTACCA AACTGCAGGTT |
| Reverse | AACCTGCAGTTTGGTAGGACT CTAGGAGCCGG |
| M-CSFR K604R | Forward | GCACTGCATCTTCTCTGCCCA GACCAAAGGCT |
| Reverse | AGCCTTTGGTCTGGGCAGAGA AGATGCAGTGC |
| M-CSFR K698R | Forward | CTCCAGGTGGATGTTCCTGTA GCTGGAGTCTCC |
| Reverse | GGAGACTCCAGCTACAGGAA CATCCACCTGGAG |
| M-CSFR K791R | Forward | CCAAAGTCCCCAATCCTGGCC ACATGTCCGC |
| Reverse | GCGGACATGTGGCCAGGATT GGGGACTTTGG |
| M-CSFR K868R | Forward | TTTGGTATCCATCCCTCACCAGTTTGTAGAACTTGTTGTTC |
| Reverse | GAACAACAAGTTCTACAAACTGGTGAGGGATGGATACCAAA |
